# Supplementary material
Source: HighWire-hosted journal article supplement (https://tobaccocontrol.bmj.com/content/32/4/467)
Supplement: inline-supplementary-material-2 [file inline-supplementary-material-2.pdf]

Supplementary Table 1: Truth Tobacco Industry Document studies describing a discrimination threshold of noticeable sensory differences

| #  | Category         | Noticeable difference/ Discrimination data                                                                                                                                  | Study type | Participants | Cigarette/market                               | Characteristics                                                                                                           | Notes                                                                                                                                                                                                                            | Year and company | Source (#id)       |
|----|------------------|-----------------------------------------------------------------------------------------------------------------------------------------------------------------------------|------------|--------------|------------------------------------------------|---------------------------------------------------------------------------------------------------------------------------|----------------------------------------------------------------------------------------------------------------------------------------------------------------------------------------------------------------------------------|------------------|--------------------|
| 1  | ventilation      | SD 55 vs 69, 69 vs 74 % (see PD)                                                                                                                                            | PC         | CP           | ULT smokers                                    | vent 55, PD 5.0; vent 69, PD 3.9; vent 74, PD 2.8                                                                         | ventilation and PD moved in parallel; "it appears it is possible to optimize a product by making various diluted/PD ratios available on the same blend"                                                                          | 1983/PM          | mgvj0037           |
| 2  | ventilation      | SD 26 vs 39, 39 vs 56 % (see PD)                                                                                                                                            | PC         | CP           | ULT smokers                                    | vent 26, PD 7.9; vent 39, PD 5.3; vent 56, PD 3.5                                                                         | ventilation and PD moved in parallel; "it appears it is possible to optimize a product by making various diluted/PD ratios available on the same blend"                                                                          | 1983/PM          | mgvj0037           |
| 3  | ventilation      | SD 0 vs 12, 12 vs 21 % (FF only)<br>NSD 12 vs 21 (LT only), 0 vs 12 %                                                                                                       | PC         | CP           | 10-15 mg smokers; 15+                          | vent 0, PD 4.3; vent 12, PD 3.4; vent 21, PD 3.1                                                                          | (further analysis of prior study); PD more important for LT smokers                                                                                                                                                              | 1983/PM          | mgvj0037           |
| 4  | ventilation      | NSD across all pairs 18 vs 30, 30 vs 35, 18 vs 35 %                                                                                                                         | PC         | CP           | LT smokers                                     | vent 18, PD 4.1; vent 30, PD 3.5; vent 35, PD 2.9                                                                         | ventilation and PD moved in parallel                                                                                                                                                                                             | 1982/PM          | gsxd0122, mgvj0037 |
| 5  | ventilation      | SD 0 vs 12, 12 vs 21 % (Winston smokers only, NSD Marlboro smokers)                                                                                                         | PC         | CP           | FF smokers                                     | vent 0, PD 4.3; vent 12, PD 3.4; vent 21, PD 3.1                                                                          | ventilation and PD moved in parallel                                                                                                                                                                                             | 1982/PM          | trxd0122, mgvj0037 |
| 6  | ventilation      | SD 0 vs 25, 0 vs 35 %<br>NSD 30 vs 40, 25 vs 30 %                                                                                                                           | PC         | EP           | FF smokers; LT smokers                         | vent 0, 25, 30, 35, 40                                                                                                    |                                                                                                                                                                                                                                  | 1994/RJR         | ksld0224           |
| 7  | ventilation      | SD acceptance at 12, discrim at between 6-12 %                                                                                                                              | MC, FA     | CP           | 5-7 mg tar (ULT) smokers                       | vent 36, 39, 44, 46, 49, 55, 59 (tar reduced from 7.3-4.5)                                                                | 12% difference equivalent to 1.5 mg tar; recommend expanding control limits to at least 6%                                                                                                                                       | 1982/RJR         | fgkc0094           |
| 8  | ventilation      | SD 35 vs 55 %<br>NSD 40 vs 50 % (imputed)                                                                                                                                   | MC, FA     | CP           | 5-7 mg tar (ULT) smokers                       | vent 36, 39, 44, 46, 49, 55, 59 (tar reduced from 7.3-4.5)                                                                | new control limits set based on findings                                                                                                                                                                                         | 1984/RJR         | ktpc0018           |
| 9  | ventilation      | SD (small) 15 vs 30, 0 vs 15; SD (strong) 0 vs 30 %                                                                                                                         | MC, FA     | EP           | Winston FF prototypes                          | vent 0, 15, 30 (and fines 0-30)                                                                                           |                                                                                                                                                                                                                                  | 1987/RJR         | xjmw0011           |
| 10 | ventilation      | SD 29 vs 36, 36 vs 41, 31 vs 41 %<br>NSD 31 vs 34, 34 vs 36 %                                                                                                               | PC         | EP           | LT prototypes                                  | vent 30, 32, 34, 36, 41; PD 110, 118                                                                                      | 10% ventilation change = change perception PD                                                                                                                                                                                    | 2000/RJR         | lgfw0186           |
| 11 | ventilation      | SD 12 vs 29, 11 vs 25 %                                                                                                                                                     | PC         | EP           | FF, LT prototypes                              | vent 0, 10, 30 (PD constant)                                                                                              | [other variables effect perception of ventilation]                                                                                                                                                                               | 1988/BW          | ezgh0045           |
| 12 | ventilation      | NSD 0 vs 10 %                                                                                                                                                               | PC         | CP           | Marlboro FF smokers, FF smokers                | vent 0, 10                                                                                                                |                                                                                                                                                                                                                                  | 1977/PM          | fxvx0124           |
| 13 | ventilation      | SD 0 vs 22 %                                                                                                                                                                | PC         | CP           | Marlboro FF smokers, FF smokers                | vent 0, 22; additional flavor (top dressing)                                                                              | SD despite offset with increased flavor                                                                                                                                                                                          | 1979/PM          | fqwh0045           |
| 14 | ventilation      | SD 0 vs 12 % (reduces impact and irritation)                                                                                                                                | PC         | EP           | FF smokers<br>Ares prototype, so no filtration | vent 0, 12                                                                                                                | "minimal change in impact and irritation... is best achieved by slight modifications in 2 or 3 design parameters as opposed to an extreme change in a single design feature"; ventilation and PD offset each other in perception | 1980/BA T        | hfx0203            |
| 15 | ventilation      | SD perception 45 vs 75 and 30 vs 58 % control                                                                                                                               | PC         | EP           | LT smokers                                     | vent 30, 45, 58, 75                                                                                                       | changes in perception include impact, body, irritation                                                                                                                                                                           | 1983/BW          | mhjy0136           |
| 16 | ventilation      | SD in strength, impact, and harshness 16 and 35 %<br>NSD acceptance 16, 23, 35 %                                                                                            | MC, FA     | CP           | LT smokers                                     | vent 16, 23 35; filter PD 84, 97, 114                                                                                     | also paired effects of ventilation and filter PD                                                                                                                                                                                 | 1991/RJR         | yygp0097           |
| 17 | ventilation      | NSD 30 vs 40 %                                                                                                                                                              | PC         | EP           | LT prototypes                                  | vent 30, 40, "benchmark" (unidentified)                                                                                   |                                                                                                                                                                                                                                  | 1994/RJR         | msld0224           |
| 18 | ventilation      | NSD 15 vs 20 % (isolated from other variables)                                                                                                                              | MC, FA     | CP           | FF Marlboro smokers                            | vent 15, 20; filter PD 100, 115; Camel/Dakota blends                                                                      | dilution paired with PD, blend                                                                                                                                                                                                   | 1990/RJR         | fxvg0100           |
| 19 | ventilation      | SD in strength and impact 0 vs 15 %<br>NSD 0 vs 10 %                                                                                                                        | PC         | EP           | LT prototypes                                  | vent 0, 10, 15                                                                                                            | other parameters appear to be constant                                                                                                                                                                                           | 1995/RJR         | qby0231, mfvj0231  |
| 20 | ventilation      | SD 50 % ventilation/high PD (lowest preference)<br>NSD 25 and 0 %                                                                                                           | MC         | EP           | LT prototypes                                  | vent 0, 25, 51; PD 4.7, 4.4, 1.6; tar ~10.5 mg                                                                            | if tar is held constant, PD becomes important. NSD - minor differences... "very equal in taste and preference"                                                                                                                   | 1974/PM          | fjvj0042           |
| 21 | ventilation      | SD 0 vs 25 % in taste and acceptability (when PD held constant)                                                                                                             | PC         | EP           | LT prototypes                                  | vent 10, 25; PD 145 mm; tar ~12 mg                                                                                        |                                                                                                                                                                                                                                  | 1990/BA T        | zkdh0135, ygvj0037 |
| 22 | ventilation      | 1% increase = 0.01 decrease acceptance and up to 0.05 decrease in sensory measures; noticeable around 0.5-0.7 (~10-12%)                                                     | MC, PC, FA | EP           | Virg LT prototypes                             | vent <37.5 to >49.6%; PD 100 to 131 mm                                                                                    | estimates effect sizes of vent changes independent of other variables [implies around 10% threshold]                                                                                                                             | 1983/BA T        | msxx0203           |
| 23 | ventilation      | SD in impact emerge around 10 % (38 vs 48); strong differences above 12 % (>50 vs 38)<br>NSD < 10 %<br>limited SD 35 vs 45, 0 vs 10 %                                       | MC, PC, FA | EP           | Virg LT prototypes                             | vent <37.5 to >49.6%; PD 100 to 131 mm                                                                                    | measured (paired) sensory effect differences                                                                                                                                                                                     | 1983/BA T        | msxx0203           |
| 24 | ventilation      | NSD 15% vs 30%                                                                                                                                                              | MC, FA     | CP           | FF/ LT/ ULT prototypes                         | filter PD 83, 103, 123; vent 0, 15, 35, 50, 65; resulting in set of products with PD, tar, nic, and t/n at various levels | resulting in products with cigarette filter pd, tar, nicotine, and t/n at various levels; acceptance was mainly a function of air dilution                                                                                       | 1985/RJR         | hiky0097           |
| 1  | pressure drop    | SD discrimination dependent on behavioral differences                                                                                                                       | PC         | EP           | LT prototypes                                  | vent 39, 51, 67, 73, 78; also varied filter efficiency (38-65); tar 4.9-7.7 mg                                            | NSD for products with = tar when puff behaviors held constant; Smoker perception of a cigarette influenced by PD more than by difference in delivery                                                                             | 1981/RJR         | mjvt0098           |
| 2  | pressure drop    | NSD 100 vs 115 mm (isolated from other variables)                                                                                                                           | MC, FA     | CP           | FF Marlboro smokers                            | vent 15, 20; filter PD 100, 115; Camel/Dakota blends                                                                      | dilution paired with PD, blend                                                                                                                                                                                                   | 1990/RJR         | fxvg0100           |
| 3  | pressure drop    | NSD perception 7.8 vs 12.6 mm (but increased effort)                                                                                                                        | MC         | CP           | FF smokers                                     | PD 7.8, 8.8, 10.6, 12.6                                                                                                   | (also evidence for compensation)                                                                                                                                                                                                 | 1984/BA T        | pnj0213, ygvj0037  |
| 4  | pressure drop    | SD draw perception at 113 mm<br>NSD 73 vs 53 mm                                                                                                                             | MC         | CP           | random recruitment smokers                     | PD 113, 73, 53 (closed filter PD 86, 54, 29); tar constant ~10 mg                                                         |                                                                                                                                                                                                                                  | 1984/BA T        | ygvj0037           |
| 5  | pressure drop    | NSD perception 135 vs 95 mm irritation/impact<br>1mm increase = 0.01 decrease acceptance and up to 0.02 decrease in other sensory; noticeable is around 0.5-0.7 (~25-35 mm) | MC, PC, FA | EP           | Virg LT prototypes                             | PD 135, 95; vent 43, 66; tar constant ~9 mg                                                                               | estimates effect sizes of PD changes independent of other variables [implies around 25mm threshold]                                                                                                                              | 1983/BA T        | msxx0203           |
| 6  | pressure drop    | SD 25 mm (95-120) flavor and mouthfeel; 30 mm (125-95) mouthfeel and impact; SD 20 mm (110-130) mouthfeel and effort<br>NSD 15 mm (100-115)                                 | MC, PC, FA | EP           | Virg LT prototypes                             | vent <37.5 to >49.6%; PD 100 to 131                                                                                       | measured (paired) sensory effect differences                                                                                                                                                                                     | 1983/BA T        | msxx0203           |
| 7  | pressure drop    | SD perception 3.9-4.6 mm<br>NSD 4.6-4.8 mm                                                                                                                                  | R          | EP           | Viceroy and Marlboro prototypes                | PD 3.9, 4.6, 4.8                                                                                                          | findings from 1977 BW study; pressure drop main source of discrimination                                                                                                                                                         | 1981/BA T        | rglj0199           |
| 8  | pressure drop    | SD perception and behavior 16-23 mm change (from 123 control)<br>NSD for 11 mm change                                                                                       | PC         | EP           | FF prototypes                                  | PD 100, 113, 123, 140 (modified by tobacco tob w/dens); tar 15-17 mg                                                      | sensory changes in impact and not flavor                                                                                                                                                                                         | 1991/BA T        | khpy0194           |
| 9  | pressure drop    | SD 124 to 141 perceived draw but no other sensory; SD perceived draw 124 to 101 mm<br>NSD PD 124 to 113 mm                                                                  | PC         | EP           | FF prototypes                                  | PD 114, 124, 125, 138 (modified by tobacco tob w/dens); tar 15-17 mg                                                      | PD changes influenced smoking mechanics but had little effect on sensory intensities                                                                                                                                             | 1994/BA T        | grdb0172           |
| 10 | pressure drop    | SD with increase of 16 or decrease of 23 mm from control<br>NSD perception when PD reduced 11 mm                                                                            | PC, FA     | EP           | FF prototypes                                  | PD 101, 113, 124, 141 (modified by tobacco tob w/dens); tar 15-17 mg                                                      | PD changes influenced smoking mechanics but had little effect on sensory intensities                                                                                                                                             | 1992/BA T        | gnep0213, grdb0172 |
| 11 | pressure drop    | -                                                                                                                                                                           | R          | -            | -                                              | -                                                                                                                         | sensory effects of PD are variable; lower PD reduces acceptance in LT but increases acceptance in ULT products                                                                                                                   | 1992/BA T        | ygvj0037           |
| 12 | pressure drop    | -                                                                                                                                                                           | TA         | CP           | Marlboro FF/ Marlboro LT smokers               | PD 4.3, vent 68; PD 6.3, vent 50                                                                                          | PD changes smoking behavior, altering perceptions; 0.5 in reduction in PD = volume increase of 6-8%; ET necessary to offset dilution                                                                                             | 1975/PM          | txkj0191           |
| 1  | cigarette length | No outcomes measured (99.5, 99, 98.5 all standardized to 98; 84 standardized to 83 mm)                                                                                      | IM         | -            | all products                                   | circ 99.5, 99, 98.5, 98; circ 84, 83; modeling indicates tob wt from 0.859 to 0.846; from 0.751 to 0.739                  | cost control measure (allows weight reduction)                                                                                                                                                                                   | 2000/PM          | nldx0219, xmw0152  |
| 2  | cigarette length | production control limits 1 mm for both 99.5, 98.5                                                                                                                          | IM         | -            | all products                                   | circ 99.5, 99, 98.5, 98                                                                                                   | [no concerns re: perception]; cost control measure (allows weight reduction)                                                                                                                                                     | 1999/PM          | gqxl0162           |
| 3  | cigarette length | 100 to 99 mm considered                                                                                                                                                     | IM         | -            | all products                                   | circ 100, 99                                                                                                              | [no concerns re: perception]; cost control measure                                                                                                                                                                               | 1999/PM          | fgpn0145           |
| 1  | filter length    | NSD 1-3 mm filter length increase                                                                                                                                           | R          | EP           | FF and LTS                                     | Flength (only change identified): 1 mm (for King), 3 mm (for 100s, paired to tipping increases)                           | Flength increase instituted across all brands (cost reduction); "will not have a significant impact on taste/smoking qualities as long as the relative draft remains the same"                                                   | 1980/RJR         | nrpm0095           |
| 2  | filter length    | SD sensory 2 mm increase<br>NSD perception 25 vs 26, 27.5 to 31, acceptance 23 to 27 mm                                                                                     | R, MC, TD  | CP           | FF, LT, ULT products                           | Flength 31, 27.5; Flength 26, 25; Flength 27, 23                                                                          | Flength "minimal effect on overall acceptability"                                                                                                                                                                                | 1997/RJR         | lqmd0230           |
| 3  | filter length    | NSD increase 27.5 vs 31 mm (some sensory (taste) difference in LT in specific subsets of smokers)                                                                           | PC, TD     | CP           | 4 LT/ULT 100 products                          | Flength 31, 27.5                                                                                                          | Flengths can be increased without affecting consumer acceptance                                                                                                                                                                  | 1984/RJR         | ntpy0093, fyvj0149 |
| 4  | filter length    | NSD acceptance 25 vs 27 mm, but SD in perception (taste/satisfaction)                                                                                                       | PC         | CP           | Merit M and FF                                 | Flength 25, 27; (wt/other changes not specified)                                                                          | recommend increase in length                                                                                                                                                                                                     | 1981/PM          | hlyj0119           |
| 5  | filter length    | NSD 13 vs 15, 13 vs 17, 15 vs 17 mm                                                                                                                                         | PC         | CP           | Viceroy                                        | Flength 13, 15, 17                                                                                                        | very early study; smokers could not discriminate across lengths                                                                                                                                                                  | 1957/BW          | mhgg0138           |
| 6  | filter length    | NSD 25 vs 26 mm                                                                                                                                                             | TD         | CP           | LT/ ULT                                        | Flength 25, 26                                                                                                            | cost savings measure; "the consumer is not able to discriminate"                                                                                                                                                                 | 1982/RJR         | kspl0184           |
| 7  | filter length    | NSD 25 vs 27 mm                                                                                                                                                             | PC         | CP           | Bright (LT)                                    | Flength 25, 27                                                                                                            |                                                                                                                                                                                                                                  | 1983/RJR         | lkkk0096, fxd0019  |
| 8  | filter length    | NSD 25 vs 27.5 mm (LT smokers)                                                                                                                                              | PC         | CP           | Merit/ LT smokers                              | Flength 25 and 27.5; tob wt 0.713, 0.678 g                                                                                | no preference differences; possible sensory differences (spicy, sweet) among Merit smokers                                                                                                                                       | 1979/PM          | jkkd0122           |
| 9  | filter length    | NSD 25 vs 27 mm (FF and LT smokers)                                                                                                                                         | PC         | CP           | Marlboro FF/ LT smokers                        | Flength 25 and 27; tob wt and dens differences                                                                            | no preference or sensory differences, FF or LT smokers                                                                                                                                                                           | 1979/PM          | njyv0119           |
| 1  | circumference    | SD 23 vs 25 mm (visual and touch + sensory)<br>NSD 24 vs 25, 25 vs 26 mm                                                                                                    | PC         | MI           | 85 mm, white tipped, 9 mg,                     | circ 22, 23, 24, 25, 26                                                                                                   | circ study                                                                                                                                                                                                                       | 1983/PM          | sknj0045           |
| 2  | circumference    | NSD perception circ reduced 25 to 24.75/24.8 mm                                                                                                                             | R          | CP, EP       | FF and LTS                                     | circ 25, 24.75, 24.8                                                                                                      | circ reduction instituted across all brands (cost reduction); "change will not have a significant impact on the taste of smoking qualities of RJR products"                                                                      | 1980/RJR         | nrpm0095           |
| 3  | circumference    | NSD perception 24.8 vs 24.5 mm                                                                                                                                              | MC, FA     | EP           | Salem FF 100                                   | circ 24.8 vs 24.5                                                                                                         | "minor perceptual difference", recommends implementation                                                                                                                                                                         | 1997/RJR         | kldv0186           |
| 4  | circumference    | no outcomes measured (24.8 to either 24.7 or 24.6 mm considered)                                                                                                            | IM         | -            | all products                                   | circ 24.8, 24.7, 24.6                                                                                                     | [implementation and outcomes?]; cost control measure (allows weight reduction)                                                                                                                                                   | 2000/PM          | nldx0219           |
| 1  | tobacco weight   | SD (enhanced smoothness) at 0.1 g (16% increase)<br>NSD at 0.05 g (8%);                                                                                                     | -          | FP           | Camel Light prototypes                         | tob wt 0.64, 0.69, 0.74, 0.81 g (modified by RT)                                                                          | [limited details]                                                                                                                                                                                                                | 1992/RJR         | qrp0095            |
| 2  | tobacco weight   | SD 8% increase for firmness, burn rate<br>NSD 4% reduction (30 mg)                                                                                                          | PC         | EP           | LT prototypes                                  | tob wt 0.73 g control, 0.70, 0.67, 0.62                                                                                   | Tob wt decreases of 8% (or more) = perceptual rod firmness and lit resistance decrease, and perceptual smoke concentration and burn rate increase                                                                                | 1992/RJR         | kkmx0084           |
| 3  | tobacco weight   | SD control-50, control-30 mg in harshness/impact<br>NSD control+50 mg                                                                                                       | MC, FA     | AP           | Marlboro, FF, LT smokers                       | tob wt 750 control, 850, 800, 720, 700, 650                                                                               | "results suggest that panelists are able to discriminate subjective differences beginning at a Tob wt reduction of 30 mg"                                                                                                        | 1995/PM          | jmgj0082           |
| 4  | tobacco weight   | SD at 50 mg 6 of 10 sensory attributes<br>NSD at 25 mg                                                                                                                      | PC         | EP           | FF prototypes                                  | tob wt 720, 745, 770, 795, 820 mg; tar ~15-16                                                                             | linear difference, not tipping point; also find sequence effects; "hesitant to recommend 25 mg weight reduction in single step"                                                                                                  | 1995/PM          | mqnp0217           |
| 5  | tobacco weight   | strong SD by puff 6<br>NSD in earlier puffs for -30 or +50 mg                                                                                                               | MC, FA     | EP           | Marlboro prototypes                            | tob wt 750 control, 850, 800, 720, 700, 650                                                                               | assess individual puffs rather than whole cigarette                                                                                                                                                                              | 1995/PM          | shml0055           |
| 6  | tobacco weight   | SD sensory at 30 mg and above including harshness, character, liking                                                                                                        | MC, PC, FA | EP           | Marlboro prototypes                            | tob wt 750 control, 850, 800, 720, 700, 650                                                                               | A weight reduction of 20 mg was sufficient to produce statistically significant differences (p < 0.05) relative to the control weight cigarette for ratings of hot, harsh, mouthfeel, and taste                                  | 1995/PM          | msmp0043           |
| 7  | tobacco weight   | SD across various other weights<br>NSD 0.95 vs 0.976, 0.882 vs 0.848                                                                                                        | MC, FA     | EP           | FF M prototypes                                | tob wt 0.848, 0.882, 0.926, 0.976, 1.031 g (control 0.95 g)                                                               | more perceptual differences in NM study; possible that menthol masked perceptual differences                                                                                                                                     | 1992/RJR         | xtlw0011           |
| 8  | tobacco weight   | NSD 1.33 vs all other configurations = NSD +0.04 g or 3% wt                                                                                                                 | MC, PC, FA | EP           | FF prototypes                                  | cig wt 1.29, 1.31, 1.33, 1.35, 1.37 g                                                                                     | "what difference from target weight elicits perceptual difference"                                                                                                                                                               | 1995/RJR         | rmbf0227           |
| 9  | tobacco weight   | NSD perception tob weight 0.734 to 0.715 g                                                                                                                                  | PC         | CP           | Marlboro FF                                    | tob wt 0.715, 0.734 (through changes in RT)                                                                               | reduced weight achieved through changes in blend                                                                                                                                                                                 | 1986/PM          | gnck0022           |
| 10 | tobacco weight   | SD weight reduction 12%<br>NSD weight reduction 6%                                                                                                                          | MC         | CP           | all products                                   | exp tob for weight reduction                                                                                              | cost reduction initiatives                                                                                                                                                                                                       | 1994/RJR         | fxvc0089           |
| 1  | density          | SD perception at 7% difference/0.02 g/cc (smallest unit measured); (strong difference at 0.04)                                                                              | MC, FA     | EP           | Camel Light, 8 mg tar                          | dens 0.23, 0.25, 0.27, 0.29, 0.31; tob wt 0.64, 0.7, 0.75, 0.81, 0.87; vent 29, 31, 33, 36, 39; tar ~8                    | air dilution rose from 29-39%                                                                                                                                                                                                    | 1985/RJR         | qjlc0087, qlyx0095 |
| 2  | density          | SD ~15 mg (in most cases)<br>NSD sensory measures 230 vs 243 mg                                                                                                             | MC, FA     | EP           | FF prototypes                                  | dens 217, 232, 247, 262, 277 mg; variable tob wt                                                                          | shared draw, differences in taste, impact, irritation                                                                                                                                                                            | 1985/BW          | ijlg0135           |
| 1  | tobacco blend    | SD perception                                                                                                                                                               | MC, PC     | CP           | LT/ ULT                                        | leaf quality changes (e.g. lugs vs tips) up to 10%                                                                        | inconsistent effects of moderate blend changes; in blind studies "smoker do recognize their own brand and tend to rate that product more favorably"                                                                              | 1995/IMP         | hsjk0138           |
| 2  | tobacco blend    | SD interactions<br>NSD perception ammoniated vs non-ammoniated RT, denicotinized vs regular tobacco                                                                         | MC, FA     | EP           | FF prototypes                                  | regular and denic flue-cured, burley; ammoniated and non-ammoniated RT                                                    | Perceptual differences are not found between G-7 and G-7A. Perceptual differences are not found between regular and denicotinized tobaccos                                                                                       | 1984/RJR         | mjdj0095           |

|    |               |                                                                                               |        |        |                             |                                                                                                              |                                                                                                                                                                                                                                                                                                                                                                      |          |                              |
|----|---------------|-----------------------------------------------------------------------------------------------|--------|--------|-----------------------------|--------------------------------------------------------------------------------------------------------------|----------------------------------------------------------------------------------------------------------------------------------------------------------------------------------------------------------------------------------------------------------------------------------------------------------------------------------------------------------------------|----------|------------------------------|
| 3  | tobacco blend | NSD 0 vs 10 RT (various pairs), up to 35% RT inclusion (expert panel)                         | PC     | CP, EP | filter cig                  | recon ("blended leaf") 5,7,5, 10; and 10-60%                                                                 | Marlb vs experimental Marlb with the BL in the blend constituting 25, 35, 55 and 75% of the total blend. One out of 7 smokers could detect differences between the Marlb and the experimental Marlb with 75% of its blend consisting of BL                                                                                                                           | 1964/PM  | kzbg0189                     |
| 4  | tobacco blend | SD perception across most other pairs<br>NSD 14-17, but SD perception across most other pairs | MC, FA | EP     | Winston Light               | stem content 11, 14, 17, 19, 21, 25                                                                          | Perceptual differences (27 characteristics) but no linear relationship established                                                                                                                                                                                                                                                                                   | 1999/RJR | gfwx0186                     |
| 5  | tobacco blend | shorts SD sensory 0 vs 8%; stems SD sensory 0 vs 2%<br>NSD sensory 0 vs 5, 5 vs 8 %           | PC     | EP     | Winston FF/ FF prototypes   | shorts 0, 5, 8; stem 0, 2                                                                                    | remove stems from products; shorts control limit plus/minus 1%                                                                                                                                                                                                                                                                                                       | 1985/RJR | llpd0098                     |
| 6  | tobacco blend | SD perception 0 vs 11, 0 vs 15, 0 vs 30, 30 vs 50<br>NSD 0 vs 6 (duo-trio);                   | R      | CP, EP | FF/ LT/ ULT prototypes      | expanded tobacco 0-50% across range of studies                                                               | SD sensory identified in most studies                                                                                                                                                                                                                                                                                                                                | 1989/RJR | jlwm0230                     |
| 7  | tobacco blend | NSD burley 13 vs 21, bright 16 vs 48 %                                                        | MC, FA | EP     | Winston LT prototypes       | burley/bright 17/32% (control), 21/16%, 13/48%                                                               | 50% decrease or increase in the Burley or Flue-cured sub-blend did not change the perception of the current product                                                                                                                                                                                                                                                  | 1990/RJR | sjwd0152                     |
| 8  | tobacco blend | NSD blend changes (increased ET/stem)                                                         | TD     | CP     | FF and LTS                  | blend changes for cost reduction                                                                             | increased expanded tobacco, rolled stem, lower grade tobacco, other changes for cost reduction                                                                                                                                                                                                                                                                       | 1982/RJR | kgfb0085                     |
| 9  | tobacco blend | NSD blend changes ET 10 vs 20 + oriental 15 vs 5 %, new RT                                    | PC     | CP     | Marlb FF                    | blend changes: increase ET 10 to 20%, oriental 15% to 5%, RL/RCB shift                                       | multiple simultaneous blend changes considered                                                                                                                                                                                                                                                                                                                       | 1983/PM  | tlpd0013                     |
| 10 | tobacco blend | NSD RT 0 vs 5%                                                                                | PC     | CP     | Marlb FF                    | recon "BL" 0, 5                                                                                              | early study; some sensory differences but not consistent                                                                                                                                                                                                                                                                                                             | 1957/PM  | lydh0106                     |
| 11 | tobacco blend | NSD change in RT type (cooked flavor RLTC vs 150B)                                            | PC     | CP     | Marlb FF                    | recon type                                                                                                   | NSD changes in processing and ingredients of reconstituted tobacco even when used at levels of ~20%                                                                                                                                                                                                                                                                  | 1984/PM  | lgwh0106                     |
| 12 | tobacco blend | NSD consolidation of sub-blends                                                               | TD     | CP     | Camel other major brands    | 20 subgrades burly reduced to 4, 20 subgrades bright reduced to 4                                            | common group blending = consolidation of products blends and sub-grades used                                                                                                                                                                                                                                                                                         | 1983/RJR | klym0184, fghk0088           |
| 13 | tobacco blend | NSD RT "dust sheet" used in place of G7-1 (inclusion level and supplier held constant)        | MC, FA | EP     | Doral FF                    | RT "dust sheet" 22, 32%; RT g7-1 22, 32%                                                                     | [some differences when inclusion or supplier changed]                                                                                                                                                                                                                                                                                                                | 1990/RJR | njwd0152                     |
| 14 | tobacco blend | SD 12% expanded tobacco                                                                       | PC, TD | CP     | Alpine/ FF M smokers        | 12% ET                                                                                                       | sensory/ taste differences identified; discrimination in duo-trio                                                                                                                                                                                                                                                                                                    | 1979/PM  | gtml0038                     |
| 15 | tobacco blend | NSD burley and bright ratio reversed (35/15 vs 15/35 %)                                       | PC     | CP     | Merit M/ FF M/ LT M smokers | bur/bri 35/15                                                                                                |                                                                                                                                                                                                                                                                                                                                                                      | 1980/PM  | znjd0122, pxnc0035, rhlh0033 |
| 16 | tobacco blend | NSD expanded tobacco 12%/ recon tob 24% vs ET 6%/RT 20%/ expanded stems 5%                    | PC     | CP     | Marlb FF                    | ET 12/6; RT 24/20                                                                                            | no sensory or preference differences                                                                                                                                                                                                                                                                                                                                 | 1980/PM  | khvw0107                     |
| 1  | nicotine      | SD high (2.95, 3.28) vs low (1.74, 2.15 mg)<br>NSD 2.95 vs 2.15 mg                            | PC     | EP     | Camel 70 prototypes         | tobacco nic 1.74, 2.15, 2.31, 2.95, 3.28, 4.07%                                                              | even the NSD group shows some evidence of discrimination                                                                                                                                                                                                                                                                                                             | 1986/RJR | klyw0095                     |
| 2  | nicotine      | NSD perception 1.72 vs 2.06 mg                                                                | PC     | EP     | unfiltered prototypes       | tobacco nic 1.72, 2.06                                                                                       | nicotine range not great enough to be detected perceptually                                                                                                                                                                                                                                                                                                          | 1986/RJR | xlfc0087                     |
| 3  | nicotine      | JND tobacco nicotine (>10% of pop) ~0.4 mg/cig; smoke nicotine ~0.2 mg/cig                    | PC, FA | EP     | FF/ LT/ ULT prototypes      | tob nic 1.7-2.6 mg; smoke nic levels 0.3-0.75 mg                                                             | [published]                                                                                                                                                                                                                                                                                                                                                          | 1988/RJR | jmkk0114                     |
| 4  | nicotine      | JND tobacco nicotine (>10% pop) ~0.2-0.3 mg/cig; smoke nicotine ~0.2 mg/cig                   | PC, FA | EP     | FF NM prototypes            | tob nic 1.3-2.4 mg; smoke nic levels ~1-2 mg                                                                 | applies to FF prototypes only                                                                                                                                                                                                                                                                                                                                        | 1985/RJR | ysdg0100                     |
| 5  | nicotine      | NSD nicotine 1.06 vs 1.28 mg (t/n from 14 to 12)                                              | MC, FA | CP     | Winston and Camel FF        | tob nic 1.06, 1.28; casing as well as blend differences                                                      | NSD Camel vs composite (Winston SD, too many factors to isolate)                                                                                                                                                                                                                                                                                                     | 1992/RJR | qnvf0055, tjxp0013           |
| 6  | nicotine      | threshold value for detection of smoke nicotine 6%                                            | R      |        | all products                | tobacco nic, other blend changes                                                                             | masking effect of tar: smokers can distinguish a cigarette with 1.1 mg tar and 1.4 mg nicotine (T/N = 7.9) from a control cigarette with the same blend without nicotine, but surprisingly cannot distinguish a cigarette with higher tar (26.5 mg) and nicotine (1.76 mg) (T/N = 15.1) from a control cigarette without nicotine, due to an apparent masking effect | 1978/RJR | jtpd0040                     |
| 7  | nicotine      | NSD 1.59 vs. 1.98 mg                                                                          | PC     | CP     | Marlb FF                    | tob nic 1.59, 1.98 (PD 5.0, 4.6 in)                                                                          |                                                                                                                                                                                                                                                                                                                                                                      | 1984/PM  | kpfb0040, tqwk0113           |
| 1  | tar           | SD acceptance at 1.5 mg tar; JND (harshness 0.7 mg)                                           | MC, FA | CP     | 5-7 mg tar (ULT) smokers    | tar 7.3, 7.1, 6.4, 6.0, 5.6, 4.9, 4.5 mg (vent 36-59)                                                        | recommend expanding control limits to at least 1.5 mg tar                                                                                                                                                                                                                                                                                                            | 1982/RJR | fgkc0094                     |
| 2  | tar           | -                                                                                             | -      | CP     | low tar smokers             | tar levels 1 - 7 mg                                                                                          | 1 mg change in tar = 7% change in acceptance; "Changes in tar level change consumers' perception of taste and acceptance of our products."                                                                                                                                                                                                                           | 1983/RJR | qjgg0003                     |
| 3  | tar           | tar control limit plus/minus 1.5 mg                                                           | MC, FA | CP     | FF/ LT/ ULT prototypes      | PD 83, 103, 123 mm and ven 0, 15, 35, 50, 65) resulting in different PD, tar, nic, and t/n at various levels | tar control limit "well within range of consumer acceptability"                                                                                                                                                                                                                                                                                                      | 1985/RJR | hiky0097                     |

Abbreviations: SD; significant difference. NSD; no significant difference. JND; just noticeable difference. PC; paired comparison. MC; monadic comparison. FA; factorial analysis. R; review (multiple studies). TD; triangle discrimination. IM; implementation. TA; topography analysis. CP; consumer panel. EP; expert panel. FG; focus group. AP; ad hoc panel. MI; mall interview. Marlb; Marlboro. Virg; Virginia. ULT; ultralight. FF; full flavor. FFLT; full flavor light. LT; light. Vent, ventilation. PD; pressure drop. Circ; circumference in mm. FL; Length; filter length. Tob wt; tobacco weight. Cig wt; cigarette weight. Dens; density. Rec tob; reconstituted tobacco. Exp tob; expanded tobacco. Tobnic; tobacco nicotine level. Smoke nic; smoke nicotine level. PM; Philip Morris International. RJR; R.J. Reynolds Tobacco Company. BW; Brown & Williamson Tobacco Corporation. BAT; British American Tobacco. IMP; Imperial Tobacco.
